# Supplementary material
Source: PubMed Central journal article supplement (PMC7483202)
Supplement: NIHMS1066319-supplement-Supplemental_Material.pdf [file NIHMS1066319-supplement-Supplemental_Material.pdf]

Supplementary Table 1.

*BPD, Depressive, and Anxiety Symptoms, and Negative Affect Change Scores with 95% CIs*

|            | ZAN-BPD<br>95%CI = CS±5.54 | ODSIS<br>95%CI = CS±3.42 | OASIS<br>95%CI = CS±3.78 | PANAS-NA<br>95%CI = CS±5.89 |
|------------|----------------------------|--------------------------|--------------------------|-----------------------------|
| <b>001</b> |                            |                          |                          |                             |
| BL         | -4 (-9.54, 1.54)           | -3 (-6.42, 0.42)         | -1 (-4.78, 2.78)         | 1 (-4.89, 6.89)             |
| TX         | -3 (-8.54, 2.54)           | 0 (-3.42, 3.42)          | 0 (-3.78, 3.78)          | -4 (-9.89, 1.89)            |
| FU         | -3 (-8.54, 2.54)           | 0 (-3.42, 3.42)          | 0 (-3.78, 3.78)          | -2 (-7.89, 3.89)            |
| <b>002</b> |                            |                          |                          |                             |
| BL         | 1 (-4.54, 6.54)            | 1 (-2.42, 4.42)          | -4 (-7.78, -0.22)*       | -9 (-14.89, -3.11)*         |
| TX         | -2 (-7.54, 3.54)           | -4 (-7.52, -0.52)*       | -6 (-8.78, -1.22)*       | -7 (-12.89, -1.11)*         |
| FU         | -1 (-6.54, 4.54)           | -4 (-7.52, -0.52)*       | -3 (-6.78, 0.78)         | -2 (-7.89, 3.89)            |
| <b>003</b> |                            |                          |                          |                             |
| BL         | -2 (-7.54, 3.54)           | 3 (-0.42, 6.42)          | -1 (-4.78, 2.78)         | 2 (-3.89, 7.89)             |
| TX         | -5 (-10.54, 0.54)          | -9 (-12.42, -5.58)*      | 1 (-2.78, 4.78)          | 8 (2.11, 13.89)^            |
| FU         | -5 (-10.54, 0.54)          | -9 (-12.42, -5.58)*      | -2 (-5.78, 1.78)         | -2 (-7.89, 3.89)            |
| <b>004</b> |                            |                          |                          |                             |
| BL         | 0 (-5.54, 5.54)            | 5 (1.58, 8.42)^          | -3 (-6.78, 0.78)         | -4 (-9.89, 1.89)            |
| TX         | -1 (-6.54, 4.54)           | -8 (-11.42, -4.58)*      | 6 (-2.22, 9.78)^         | 6 (.11, 11.89)^             |
| FU         | -3 (-8.54, 2.54)           | -9 (-12.42, -5.58)*      | -1 (-4.78, 2.78)         | 2 (-3.89, 7.89)             |
| <b>005</b> |                            |                          |                          |                             |
| BL         | -2 (-7.54, 3.54)           | 0 (-3.42, 3.42)          | 0 (-3.78, 3.78)          | 4 (-1.89, 9.89)             |
| TX         | -4 (-9.54, 1.54)           | 0 (-3.42, 3.42)          | 0 (-3.78, 3.78)          | -9 (-14.89, -3.11)*         |
| FU         | 4 (-1.54, 9.54)            | 0 (-3.42, 3.42)          | 0 (-3.78, 3.78)          | 16 (10.11, 21.89)^          |
| <b>006</b> |                            |                          |                          |                             |
| BL         | -6 (-11.54, -0.46)*        | -8 (-11.42, -4.58)*      | -2 (-5.78, 1.78)         | -6 (-11.89, .11)*           |
| TX         | 7 (1.46, 12.54)^           | 11 (7.58, 14.42)^        | 8 (4.22, 11.78)^         | 3 (-2.89, 8.89)             |
| FU         | 6 (0.46, 11.54)^           | 4 (0.52, 7.52)^          | 5 (1.22, 8.78)^          | 6 (.11, 11.89)^             |
| <b>007</b> |                            |                          |                          |                             |
| BL         | -1 (-6.54, 4.54)           | 4 (0.52, 7.52)^          | 2 (-1.78, 5.78)          | 8 (2.11, 13.89)^            |
| TX         | -3 (-8.54, 2.54)           | -7 (-10.42, -3.58)*      | -10 (-13.78, -6.22)*     | -23 (-28.89, -17.11)*       |
| FU         | -3 (-8.54, 2.54)           | -7 (-10.42, -3.58)*      | -10 (-13.78, -6.22)*     | -23 (-28.89, -17.11)*       |
| <b>008</b> |                            |                          |                          |                             |
| BL         | -5 (-10.54, 0.54)          | 1 (-2.42, 4.42)          | 1 (-2.78, 4.78)          | 17 (11.11, 22.89)^          |
| TX         | 7 (1.46, 12.54)^*          | -2 (-5.42, 1.42)         | 2 (-1.78, 5.78)^         | 2 (-3.89, 7.89)             |
| FU         | -2 (-7.54, 3.54)           | -3 (-6.42, 0.42)         | -8 (-11.78, 4.22)*       | -30 (-35.89, -24.11)*       |

Note: Negative change scores indicate decreases on a given measure, positive change scores indicate increases. Listed at the top of each column is the  $1.96 \times S_{diff}$  value used for each measure to calculate the 95% CIs around each change score. CI = Confidence interval; BL = change from first baseline score to last baseline score; TX = change from last baseline score to post-test (after Session 4); FU = change from last baseline to 4-wk follow-up. \* indicates improvement  $p < .05$ . ^ indicates worsening  $p < .05$

Supplementary Figure 1

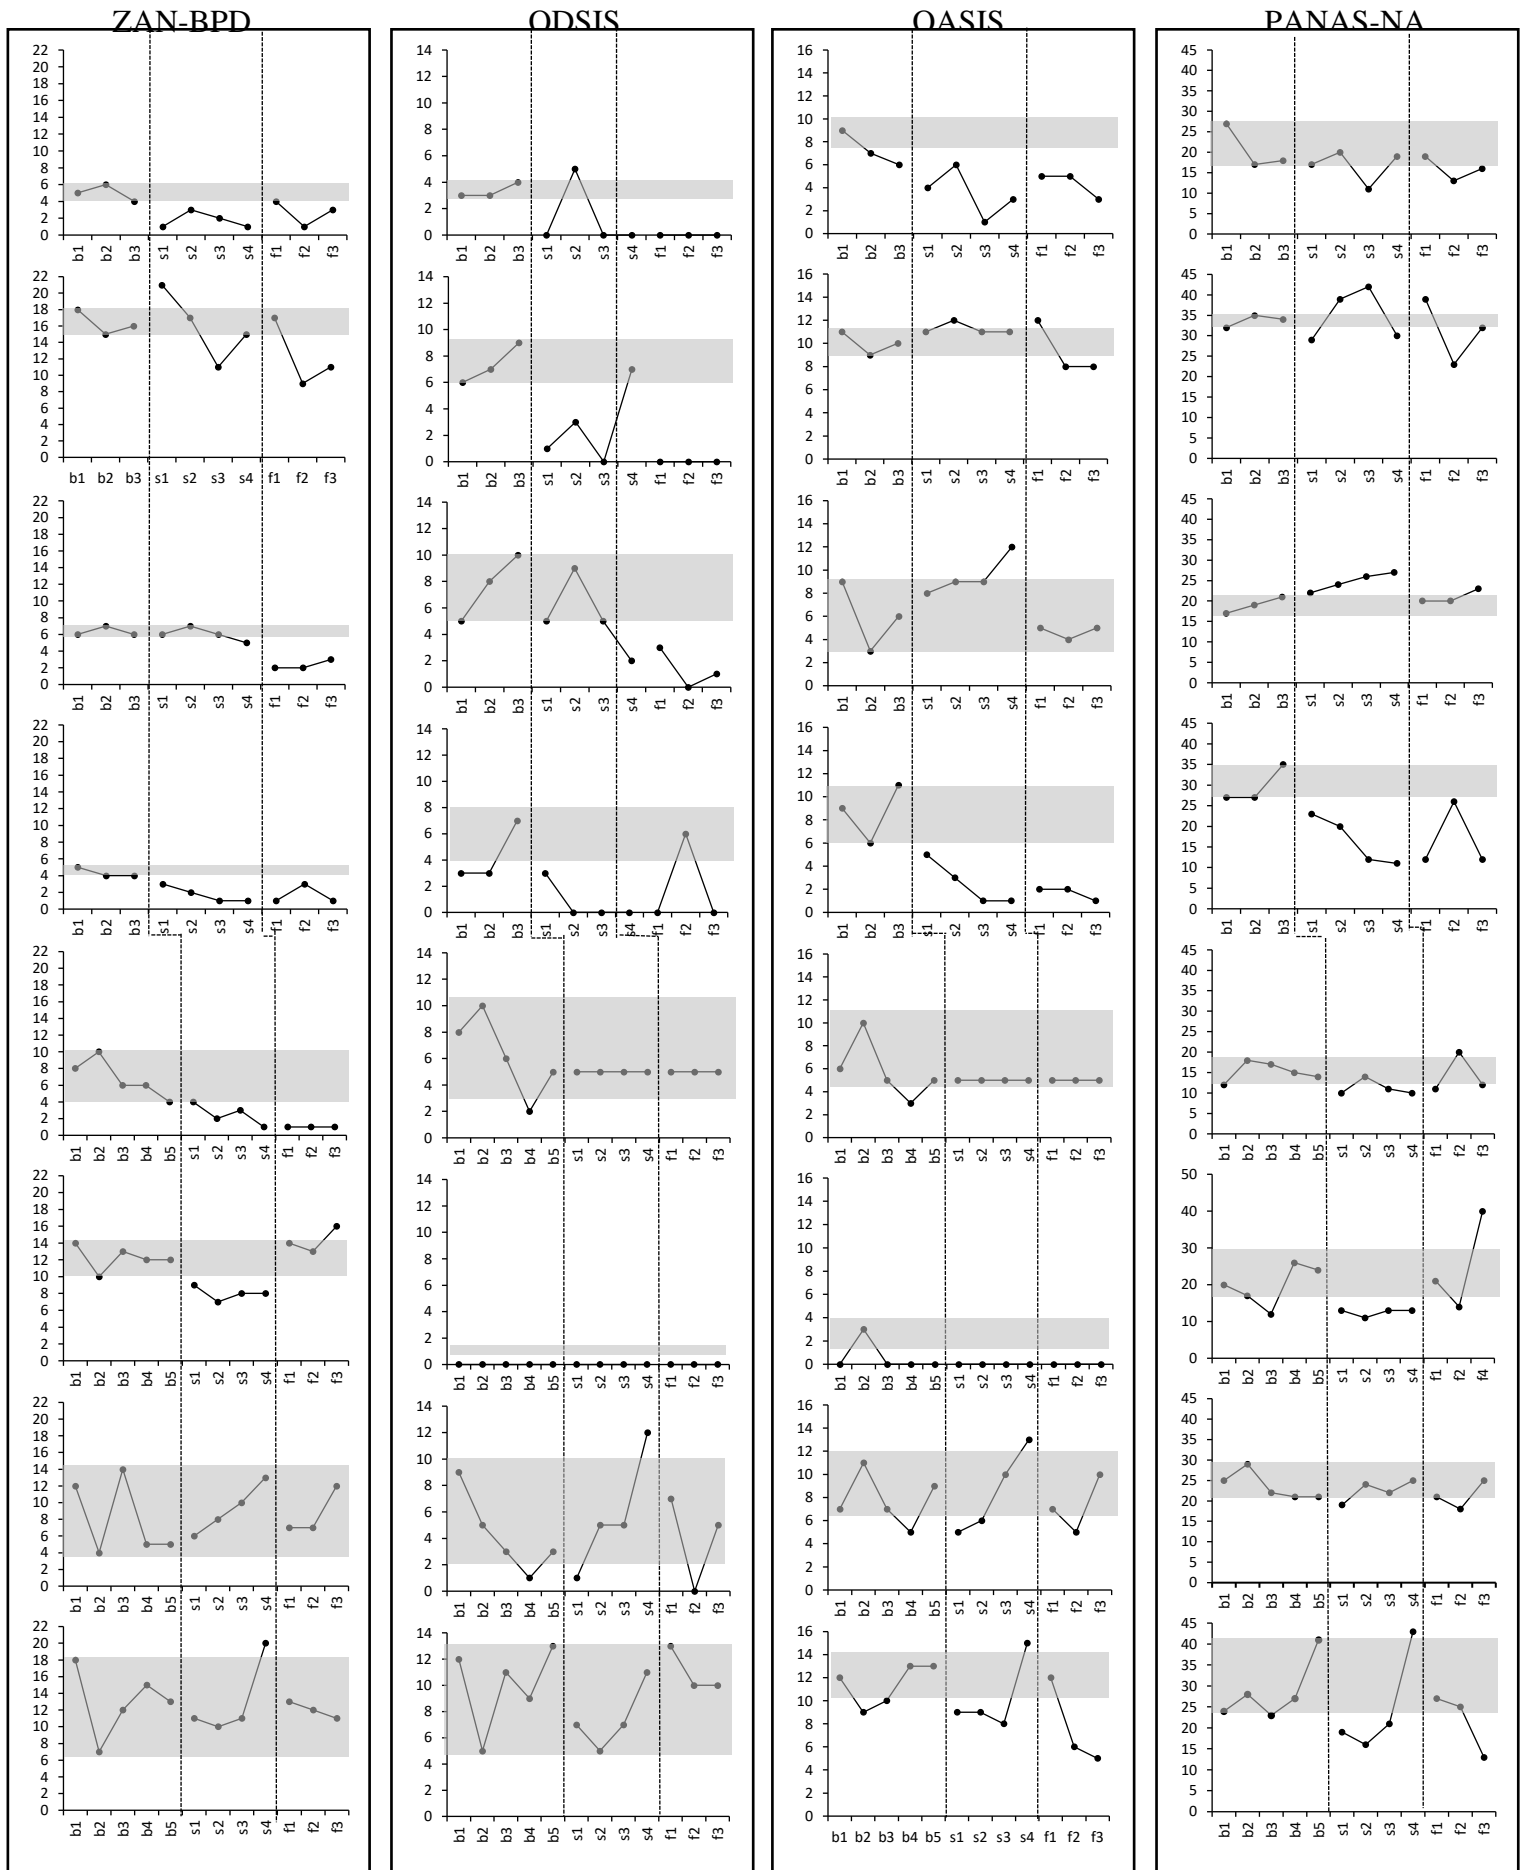

*Supplementary Figure 1:* Weekly scores on measures of borderline personality disorder symptoms, depressive symptoms, anxiety symptoms, and negative affectivity for each participant plotted as a function of study phase (baseline, treatment, follow-up). Participants 002, 003, 004, and 007 were randomized to the two-week baseline condition. Participants 001, 005, 006, and 008 were randomized to the four-week baseline condition. The Y axis refers to each week in the study; b = baseline (b1, b2, b3, b4...), s = sessions during the intervention phase (s1, s2, s3, s4), and f = follow-up (f1, f2, f3...). The highlighted gray band in each graph donates the range of scores for the baseline phase, allowing readers to determine whether treatment and follow-up data points fell below baseline levels. ZAN-BPD = Zanarini Rating Scale for Borderline Personality Disorder; ODSIS = Overall Depression Severity and Impairment Scale; OASIS = Overall Anxiety Severity and Impairment Scale; PANAS-NA = Positive and Negative Affect Schedule - Negative Affect Subscale.
